# Supplementary material for: A suite of selective pressures supports the maintenance of alleles of a Drosophila immune peptide
Source: eLife. 2025 May 30;12:RP90638. doi: 10.7554/eLife.90638 (PMC12124834; doi:10.7554/eLife.90638)
Supplement: Supplementary file 1. [file elife-90638-supp1.xlsx]

## Sheet: Sheet1
Oligo name	Primer sequence	Use	Reference
wsp-81F	TGGTCCAATAAGTGATGAAGAAAC	Wolbachia status	Braig et al. 1998
Wsp-691R	AAAAATTAAACGCTACTCCA	Wolbachia status	Braig et al. 1998
Actin79B-F	CGTCTACCAGTCCATCATGA	Species identification
Actin79B-R	AGACGGAGTACTTGCGCTC	Species identification
Dpt_cw_F	GCCTATAAAAGAGCATCGAA	Diptericin	Clark and Wang, 1997
Dpt_cw_R	GCTAGACTCGGATACCAATCGAG	Diptericin	Clark and Wang, 1997
Dpt_gRNA18_S	CTTCGATGGCAACTCAGAACCGACG	gRNA	This work
Dpt_gRNA18_A	AAACGCTCGGTTCTGAGTTCGGATC	gRNA	This work
ssODN	AAACGCTCGGTTCTGAGTTCGGATCCGCCACGAGATTGGACTGAATGGAGGATATGGACAGCACTTGGGAGGACCATACGGCAACTCAGAACCGAGATGGAAAGTGGGAAGCACCTACACCTACAGATTTCCGAATTTCTAAGCT	ssODN	This work
