# Supplementary material for: A suite of selective pressures supports the maintenance of alleles of a Drosophila immune peptide
Source: eLife. 2025 May 30;12:RP90638. doi: 10.7554/eLife.90638 (PMC12124834; doi:10.7554/eLife.90638)
Supplement: Supplementary file 2. — p-Values less than 0.05 are underlined. [file elife-90638-supp2.xlsx]

## Sheet: Sheet1
P. rettgeri
	imd-	Δdpt	dptS69R
Δdpt	0.0407	-	-
dptS69R	0.454	0.26329	-
dptS69	0.00012	1.1e-09	1.3e-06
S. succinus
	imd-	Δdpt	dptS69R
Δdpt	0.4994	-	-
dptS69R	0.0672	0.0023	-
dptS69	0.4994	0.9828	0.012
E. faecalis
	imd-	Δdpt	dptS69R
Δdpt	0.0264	-	-
dptS69R	0.0264	1e-06	-
dptS69	0.2969	0.3405	0.0021
L. fusiformis
	imd-	Δdpt	dptS69R
Δdpt	0.435	-	-
dptS69R	0.048	0.22	-
dptS69	0.435	0.927	0.19
L. lactis
	imd-	Δdpt	dptS69R
Δdpt	0.7515	-	-
dptS69R	0.0474	0.0474	-
dptS69	0.1966	0.0858	0.0015
S. marcescens
	imd-	Δdpt	dptS69R
Δdpt	<2e-16	-	-
dptS69R	<2e-16	0.1151	-
dptS69	<2e-16	0.054	0.0042
