# Supplementary material for: A suite of selective pressures supports the maintenance of alleles of a Drosophila immune peptide
Source: eLife. 2025 May 30;12:RP90638. doi: 10.7554/eLife.90638 (PMC12124834; doi:10.7554/eLife.90638)
Supplement: Supplementary file 3. — p-Values less than 0.05 are underlined. [file elife-90638-supp3.xlsx]

## Sheet: Sheet1
P. rettgeri
	F-imd-	M-imd-	F-Δdpt	M-Δdpt	F- dptS69R	M- dptS69R	F- dptS69
M-imd-	0.256	-	-	-	-	-	-
F-Δdpt	0.1592	0.8278	-	-	-	-	-
M-Δdpt	0.2356	0.9763	0.8278	-	-	-	-
F- dptS69R	0.9763	0.2981	0.1933	0.256	-	-	-
M-d dptS69R	0.0144	0.1124	0.151	0.1124	0.0152	-	-
F- dptS69	5.6e-05	0.0014	0.0014	0.0008	8.8e-05	0.3598	-
M- dptS69	3.7e-06	9.6e-05	9.6e-05	7.7e-05	6.5e-06	0.1639	0.5982
E. faecalis
	F-imd-	M-imd-	F-Δdpt	M-Δdpt	F- dptS69R	M- dptS69R	F- dptS69
M-imd-	0.0304	-	-	-	-	-	-
F-Δdpt	0.0036	0.8954	-	-	-	-	-
M-Δdpt	0.0012	0.7414	0.7414	-	-	-	-
F- dptS69R	0.7414	0.1433	0.0326	0.0158	-	-	-
M- dptS69R	0.0318	0.9686	0.8893	0.7414	0.1566	-	-
F- dptS69	0.0326	0.9686	0.8779	0.7414	0.1701	0.9686	-
M- dptS69	0.0114	0.753	0.8664	0.9686	0.0511	0.7414	0.7414
L. plantarum
	F-imd-	M-imd-	F-Δdpt	M-Δdpt	F- dptS69R	M- dptS69R	F- dptS69
M-imd-	<2e-16	-	-	-	-	-	-
F-Δdpt	3.8e-08	<2e-16	-	-	-	-	-
M-Δdpt	<2e-16	8.1e-09	<2e-16	-	-	-	-
F- dptS69	<2e-16	3.2e-09	7.6e-15	0.734	-	-	-
M- dptS69R	<2e-16	1.8e-12	8.3e-15	0.372	0.197	-	-
F- dptS69	<2e-16	6e-15	1e-10	0.08	0.056	0.548	-
M- dptS69	<2e-16	5.4e-07	<2e-16	0.364	0.662	0.056	0.013
