# Supplementary material for: A suite of selective pressures supports the maintenance of alleles of a Drosophila immune peptide
Source: eLife. 2025 May 30;12:RP90638. doi: 10.7554/eLife.90638 (PMC12124834; doi:10.7554/eLife.90638)
Supplement: Supplementary file 4. — p-Values less than 0.05 are underlined. [file elife-90638-supp4.xlsx]

## Sheet: Sheet1
Axenic
	F-imd-	F-Δdpt	F-dptS69R	F-dptS69	M-imd-	M-Δdpt	M- dptS69R
F-Δdpt	1	-	-	-	-	-	-
F-dptS69R	0.0006	<2e-16	-	-	-	-	-
F-dptS69	0.9447	0.8051	0.063	-	-	-	-
M-imd-	<2e-16	<2e-16	<2e-16	<2e-16	-	-	-
M-Δdpt	0.0001	<2e-16	1	0.0492	<2e-16	-	-
M-dptS69R	0.1713	0.0519	0.7467	0.8822	<2e-16	0.8133	-
M-dptS69	0.0001	<2e-16	1	0.0218	<2e-16	0.9947	0.5114
L. plantarum
	F-imd-	F-Δdpt	F-dptS69R	F-dptS69	M-imd-	M-Δdpt	M-dptS69R
F-Δdpt	0.0064	-	-	-	-	-	-
F-dptS69R	<2e-16	<2e-16	-	-	-	-	-
F- dptS69	<2e-16	<2e-16	0.185	-	-	-	-
M-imd-	<2e-16	<2e-16	<2e-16	<2e-16	-	-	-
M-Δdpt	<2e-16	<2e-16	0.9992	0.2479	<2e-16	-	-
M-dptS69R	<2e-16	<2e-16	1	0.2568	<2e-16	0.9999	-
M-dptS69	<2e-16	<2e-16	0.9531	0.0056	<2e-16	0.5593	0.9198
P. rettgeri
	F-imd-	F-Δdpt	F- dptS69R	F- dptS69	M-imd-	M-Δdpt	M-dptS69R
F-Δdpt	<2e-16	-	-	-	-	-	-
F-dptS69R	0.0001	0.1564	-	-	-	-	-
F-dptS69	<2e-16	0.5911	0.9977	-	-	-	-
M-imd-	<2e-16	0.0112	<2e-16	0.0001	-	-	-
M-Δdpt	0.0234	<2e-16	0.481	0.0995	<2e-16	-	-
M-dptS69R	0.0013	0.0363	0.9997	0.9434	<2e-16	0.8429	-
M-dptS69	0.0938	0.0001	0.6415	0.2208	<2e-16	1	0.9079
L. brevis
	F-imd-	F-Δdpt	F-dptS69R	F-dptS69	M-imd-	M-Δdpt	M-dptS69R
F-Δdpt	<2e-16	-	-	-	-	-	-
F- dptS69R	<2e-16	0.0348	-	-	-	-	-
F- dptS69	0.0004	0.0009	0.9874	-	-	-	-
M-imd-	<2e-16	<2e-16	<2e-16	<2e-16	-	-	-
M-Δdpt	0.0175	<2e-16	0.118	0.687	<2e-16	-	-
M-dptS69R	0.0206	<2e-16	0.5139	0.963	<2e-16	0.9998	-
M- dptS69	0.402	<2e-16	0.0333	0.297	<2e-16	0.9803	0.9241
A. tropicalis
	F-imd-	F-Δdpt	F-dptS69R	F-dptS69	M-imd-	M-Δdpt	M-dptS69R
F-Δdpt	<2e-16	-	-	-	-	-	-
F-dptS69R	0.2941	<2e-16	-	-	-	-	-
F-dptS69	<2e-16	0.9003	<2e-16	-	-	-	-
M-imd-	0.0016	<2e-16	0.6689	0.0255	-	-	-
M-Δdpt	0.0017	<2e-16	0.8677	0.0004	0.9987	-	-
M-dptS69R	0.9522	<2e-16	0.9472	<2e-16	0.0876	0.1404	-
M-dptS69	0.1403	<2e-16	1	0.0002	0.8812	0.9821	0.8103
L. plantarum + P. rettgeri
	F-imd-	F-Δdpt	F-dptS69R	F-dptS69	M-imd-	M-Δdpt	M-dptS69R
F-Δdpt	0.1291	-	-	-	-	-	-
F- dptS69R	<2e-16	<2e-16	-	-	-	-	-
F- dptS69	<2e-16	<2e-16	0.3736	-	-	-	-
M-imd-	<2e-16	<2e-16	0.0009	<2e-16	-	-	-
M-Δdpt	<2e-16	<2e-16	0.0176	0.9872	<2e-16	-	-
M- dptS69R	<2e-16	<2e-16	0.998	0.807	0.0001	0.1564	-
M- dptS69	<2e-16	<2e-16	0.1446	0.9998	<2e-16	1	0.5051
L. plantarum + A. tropicalis
	F-imd-	F-Δdpt	F-dptS69R	F-dptS69	M-imd-	M-Δdpt	M- dptS69R
F-Δdpt	0.008	-	-	-	-	-	-
F-dptS69R	<2e-16	<2e-16	-	-	-	-	-
F-dptS69	<2e-16	<2e-16	0.0632	-	-	-	-
M-imd-	<2e-16	<2e-16	0.9998	0.1957	-	-	-
M-Δdpt	<2e-16	<2e-16	0.9998	0.058	1	-	-
M-dptS69R	<2e-16	<2e-16	0.8864	0.7167	0.9893	0.9573	-
M-dptS69	<2e-16	<2e-16	0.6101	0.944	0.8792	0.7135	0.9997
