# Supplementary material for: A suite of selective pressures supports the maintenance of alleles of a Drosophila immune peptide
Source: eLife. 2025 May 30;12:RP90638. doi: 10.7554/eLife.90638 (PMC12124834; doi:10.7554/eLife.90638)
Supplement: Supplementary file 5. — p-Values less than 0.05 are underlined. [file elife-90638-supp5.xlsx]

## Sheet: Sheet1
Day 2 L. plantarum
	F-imd-	F-Δdpt	F-dptS69R	F-dptS69	M-imd-	M-Δdpt	M-dptS69R
F-Δdpt	0.8875	NA	NA	NA	NA	NA	NA
F-dptS69R	0.9595	0.9999	NA	NA	NA	NA	NA
F-dptS69	0.4774	0.7296	0.6348	NA	NA	NA	NA
M-imd-	0.966	1	1	0.5932	NA	NA	NA
M-Δdpt	0.2644	0.1289	0.153	0.9983	0.1308	NA	NA
M-dptS69R	0.8632	1	0.999	0.924	0.9982	0.4745	NA
M-dptS69	0.8237	0.9999	0.996	0.9628	0.9928	0.5926	1
Day 10 L. plantarum
	F-imd-	F-Δdpt	F-dptS69R	F-dptS69	M-imd-	M-Δdpt	M-dptS69R
F-Δdpt	0.8875	NA	NA	NA	NA	NA	NA
F-dptS69R	0.9595	0.9999	NA	NA	NA	NA	NA
F-dptS69	0.4774	0.7296	0.6348	NA	NA	NA	NA
M-imd-	0.966	1	1	0.5932	NA	NA	NA
M-Δdpt	0.2644	0.1289	0.153	0.9983	0.1308	NA	NA
M-dptS69R	0.8632	1	0.999	0.924	0.9982	0.4745	NA
M-dptS69	0.8237	0.9999	0.996	0.9628	0.9928	0.5926	1
Day 20 L. plantarum (no imd females)
	F-imd-	F-Δdpt	F-dptS69R	F-dptS69	M-imd-	M-Δdpt	M-dptS69R
F-Δdpt	NA	NA	NA	NA	NA	NA	NA
F-dptS69R	NA	0.9978	NA	NA	NA	NA	NA
F-dptS69	NA	1	0.9943	NA	NA	NA	NA
M-imd-	NA	0.9998	1	0.9991	NA	NA	NA
M-Δdpt	NA	0.0935	0.0314	0.2254	0.0553	NA	NA
M-dptS69R	NA	1	0.9807	1	0.9952	0.3207	NA
M-dptS69	NA	0.34	0.1438	0.5173	0.2122	1	0.6305
Day 2 P. rettgeri
	F-imd-	F-Δdpt	F-dptS69R	F-dptS69	M-imd-	M-Δdpt	M-dptS69R
F-Δdpt	0.0406	NA	NA	NA	NA	NA	NA
F-dptS69R	0.5572	0.9645	NA	NA	NA	NA	NA
F-dptS69	0.0234	0.9952	0.7777	NA	NA	NA	NA
M-imd-	0.5805	0.9565	1	0.7576	NA	NA	NA
M-Δdpt	0.0021	0.912	0.4482	1	0.4228	NA	NA
M-dptS69R	0.001	0.5392	0.1887	0.9679	0.1757	0.9842	NA
M-dptS69	0.0004	0.3479	0.1066	0.8962	0.0984	0.9237	1
Day 10 P. rettgeri
	F-imd-	F-Δdpt	F-dptS69R	F-dptS69	M-imd-	M-Δdpt	M-dptS69R
F-Δdpt	0.9999	NA	NA	NA	NA	NA	NA
F-dptS69R	0.1574	0.1425	NA	NA	NA	NA	NA
F-dptS69	0.9844	0.998	0.5859	NA	NA	NA	NA
M-imd-	0.0707	0.0541	0.9999	0.351	NA	NA	NA
M-Δdpt	0.9334	0.9767	0.57	1	0.3138	NA	NA
M-dptS69R	0.0086	0.0042	0.9253	0.0653	0.9903	0.0432	NA
M-dptS69	0.904	0.958	0.8201	0.9999	0.5938	1	0.1563
Day 20 P. rettgeri
	F-imd-	F-Δdpt	F-dptS69R	F-dptS69	M-imd-	M-Δdpt	M-dptS69R
F-Δdpt	1	NA	NA	NA	NA	NA	NA
F-dptS69R	0.0241	0.0003	NA	NA	NA	NA	NA
F-dptS69	0.7316	0.4202	0.1779	NA	NA	NA	NA
M-imd-	0.3846	0.0835	0.5982	0.9932	NA	NA	NA
M-Δdpt	1	1	0.0003	0.4122	0.081	NA	NA
M-dptS69R	0.0838	0.0032	0.996	0.5558	0.9479	0.003	NA
M-dptS69	0.9304	0.8325	0.0445	0.9984	0.8519	0.826	0.2147
Day 2 L. brevis
	F-imd-	F-Δdpt	F-dptS69R	F-dptS69	M-imd-	M-Δdpt	M-dptS69R
F-Δdpt	0.0027	NA	NA	NA	NA	NA	NA
F-dptS69R	0.0209	1	NA	NA	NA	NA	NA
F-dptS69	0.0855	0.9932	0.9993	NA	NA	NA	NA
M-imd-	0.0003	0.8295	0.8593	0.5336	NA	NA	NA
M-Δdpt	<02e-16	0.619	0.7332	0.3352	1	NA	NA
M-dptS69R	<02e-16	0.0511	0.1029	0.026	0.8176	0.7015	NA
M-dptS69	0.0001	0.5769	0.6552	0.3136	1	0.9999	0.9518
Day 10 L. brevis
	F-imd-	F-Δdpt	F-dptS69R	F-dptS69	M-imd-	M-Δdpt	M-dptS69R
F-Δdpt	0.9892	NA	NA	NA	NA	NA	NA
F-dptS69R	1	0.9836	NA	NA	NA	NA	NA
F-dptS69	0.6678	0.9554	0.6632	NA	NA	NA	NA
M-imd-	0.9941	0.6931	0.9989	0.2425	NA	NA	NA
M-Δdpt	0.0849	0.2951	0.1117	0.9918	0.0087	NA	NA
M-dptS69R	0.9987	1	0.9971	0.9634	0.8893	0.4734	NA
M-dptS69	0.0801	0.2515	0.095	0.9423	0.0119	0.9995	0.3653
Day 20 L. brevis
	F-imd-	F-Δdpt	F-dptS69R	F-dptS69	M-imd-	M-Δdpt	M-dptS69R
F-Δdpt	0.9999	NA	NA	NA	NA	NA	NA
F-dptS69R	0.9998	0.9808	NA	NA	NA	NA	NA
F-dptS69	1	0.9997	0.9999	NA	NA	NA	NA
M-imd-	0.0045	0.0002	0.0175	0.0056	NA	NA	NA
M-Δdpt	0.9469	0.9854	0.7085	0.9241	0	NA	NA
M-dptS69R	0.9981	1	0.9528	0.9962	0.0006	0.9999	NA
M-dptS69	0.954	0.9876	0.7694	0.9363	0.0001	1	0.9998
Day 2 A. tropicalis
	F-imd-	F-Δdpt	F-dptS69R	F-dptS69	M-imd-	M-Δdpt	M-dptS69R
F-Δdpt	0.9999	NA	NA	NA	NA	NA	NA
F-dptS69R	0.9981	0.9373	NA	NA	NA	NA	NA
F-dptS69	0.9993	0.9626	1	NA	NA	NA	NA
M-imd-	0.206	0.0304	0.5635	0.5008	NA	NA	NA
M-Δdpt	0.5631	0.1075	0.9417	0.9084	0.9672	NA	NA
M-dptS69R	0.1343	0.0157	0.4295	0.372	1	0.9048	NA
M-dptS69	0.9994	0.9634	1	1	0.4983	0.9069	0.3698
Day 10 A. tropicalis
	F-imd-	F-Δdpt	F-dptS69R	F-dptS69	M-imd-	M-Δdpt	M-dptS69R
F-Δdpt	0.5974	NA	NA	NA	NA	NA	NA
F-dptS69R	1	0.2639	NA	NA	NA	NA	NA
F-dptS69	0.812	1	0.5422	NA	NA	NA	NA
M-imd-	0.9993	0.1249	1	0.3359	NA	NA	NA
M-Δdpt	0.004	0.0796	0.0002	0.1109	0.0001	NA	NA
M-dptS69R	0.9998	0.7771	0.994	0.9394	0.9524	0.0035	NA
M-dptS69	<2e-16	0.0002	<2e-16	0.0005	<2e-16	0.2145	<2e-16
Day 20 A. tropicalis
	F-imd-	F-Δdpt	F-dptS69R	F-dptS69	M-imd-	M-Δdpt	M-dptS69R
F-Δdpt	0.9956	NA	NA	NA	NA	NA	NA
F-dptS69R	1	0.9988	NA	NA	NA	NA	NA
F-dptS69	1	0.998	1	NA	NA	NA	NA
M-imd-	0.9999	0.6771	0.9677	0.9743	NA	NA	NA
M-Δdpt	0.1447	0.0377	0.0201	0.0177	0.0008	NA	NA
M-dptS69R	1	0.999	1	1	0.9677	0.0201	NA
M-dptS69	0.0049	0.0001	0.0001	0.0001	<2e-16	0.3458	0.0001
