# Supplementary material for: A suite of selective pressures supports the maintenance of alleles of a Drosophila immune peptide
Source: eLife. 2025 May 30;12:RP90638. doi: 10.7554/eLife.90638 (PMC12124834; doi:10.7554/eLife.90638)
Supplement: Supplementary file 6. — p-Values less than 0.05 are underlined. [file elife-90638-supp6.xlsx]

## Sheet: Sheet1
Day 2 L. plantarum
	F-imd-	F-Δdpt	F-dptS69R	F-dptS69	M-imd-	M-Δdpt	M-dptS69R
F-Δdpt	0.2226	NA	NA	NA	NA	NA	NA
F-dptS69R	0.0101	0.6004	NA	NA	NA	NA	NA
F-dptS69	<2e-16	0.0002	0.1471	NA	NA	NA	NA
M-imd-	0.421	1	0.7283	0.0017	NA	NA	NA
M-Δdpt	0.0031	0.483	1	0.0344	0.6898	NA	NA
M-dptS69R	<2e-16	0.0006	0.2442	1	0.0038	0.0725	NA
M-dptS69	<2e-16	0.0004	0.2095	1	0.0029	0.0577	1
Day 10 L. plantarum
	F-imd-	F-Δdpt	F-dptS69R	F-dptS69	M-imd-	M-Δdpt	M-dptS69R
F-Δdpt	0.2226	NA	NA	NA	NA	NA	NA
F-dptS69R	0.0101	0.6004	NA	NA	NA	NA	NA
F-dptS69	<2e-16	0.0002	0.1471	NA	NA	NA	NA
M-imd-	0.421	1	0.7283	0.0017	NA	NA	NA
M-Δdpt	0.0031	0.483	1	0.0344	0.6898	NA	NA
M-dptS69R	<2e-16	0.0006	0.2442	1	0.0038	0.0725	NA
M-dptS69	<2e-16	0.0004	0.2095	1	0.0029	0.0577	1
Day 20 L. plantarum (no imd females)
	F-imd-	F-Δdpt	F-dptS69R	F-dptS69	M-imd-	M-Δdpt	M-dptS69R
F-Δdpt	NA	NA	NA	NA	NA	NA	NA
F-dptS69R	NA	0.831	NA	NA	NA	NA	NA
F-dptS69	NA	0.9883	0.9977	NA	NA	NA	NA
M-imd-	NA	0.5334	0.9998	0.9429	NA	NA	NA
M-Δdpt	NA	0.9999	0.484	0.857	0.1772	NA	NA
M-dptS69R	NA	0.9202	1	0.9999	0.9943	0.6188	NA
M-dptS69	NA	0.9999	0.5746	0.8987	0.2615	1	0.7064
Day 2 P. rettgeri
	F-imd-	F-Δdpt	F-dptS69R	F-dptS69	M-imd-	M-Δdpt	M-dptS69R
F-Δdpt	0.0784	NA	NA	NA	NA	NA	NA
F-dptS69R	0.1199	1	NA	NA	NA	NA	NA
F-dptS69	0.434	0.9992	0.9966	NA	NA	NA	NA
M-imd-	0.8069	0.912	0.8957	0.9988	NA	NA	NA
M-Δdpt	0.0063	0.9457	0.9972	0.8097	0.3815	NA	NA
M-dptS69R	0.131	1	1	0.9977	0.9101	0.9957	NA
M-dptS69	0.0348	0.9902	0.9996	0.9254	0.6186	1	0.9993
Day 10 P. rettgeri
	F-imd-	F-Δdpt	F-dptS69R	F-dptS69	M-imd-	M-Δdpt	M-dptS69R
F-Δdpt	1	NA	NA	NA	NA	NA	NA
F-dptS69R	0.993	0.9967	NA	NA	NA	NA	NA
F-dptS69	0.9835	0.9901	1	NA	NA	NA	NA
M-imd-	0.998	0.9994	1	1	NA	NA	NA
M-Δdpt	1	0.9997	0.9485	0.9085	0.9773	NA	NA
M-dptS69R	1	1	0.9998	0.9992	1	0.9981	NA
M-dptS69	0.9911	0.9954	1	1	1	0.9393	0.9998
Day 20 P. rettgeri (no imd females)
	F-imd-	F-Δdpt	F-dptS69R	F-dptS69	M-imd-	M-Δdpt	M-dptS69R
F-Δdpt	NA	NA	NA	NA	NA	NA	NA
F-dptS69R	NA	0.9927	NA	NA	NA	NA	NA
F-dptS69	NA	0.9971	0.8027	NA	NA	NA	NA
M-imd-	NA	0.9999	0.911	1	NA	NA	NA
M-Δdpt	NA	0.964	1	0.5715	0.7503	NA	NA
M-dptS69R	NA	1	0.9896	0.9966	0.9998	0.9478	NA
M-dptS69	NA	0.9991	1	0.8929	0.9652	0.9998	0.9986
