# Supplementary material for: A suite of selective pressures supports the maintenance of alleles of a Drosophila immune peptide
Source: eLife. 2025 May 30;12:RP90638. doi: 10.7554/eLife.90638 (PMC12124834; doi:10.7554/eLife.90638)
Supplement: Supplementary file 7. — p-Values less than 0.05 are underlined. ‘A’ refers to flies reared axenically, ‘C’ refers to flies reared on a conventional diet. [file elife-90638-supp7.xlsx]

## Sheet: Sheet1
	A dptS69	A	A	A	A	A	C	C	C	C	C
		Δdpt	dptS69R	imd-	OreR	w1118	dptS69	Δdpt	dptS69R	imd-	OreR
A Δdpt	0.9999	NA	NA	NA	NA	NA	NA	NA	NA	NA	NA
A dptS69R	0.3541	0.9978	NA	NA	NA	NA	NA	NA	NA	NA	NA
A imd-	0.9195	0.8332	0.003	NA	NA	NA	NA	NA	NA	NA	NA
A OreR	1	1	0.5898	0.8561	NA	NA	NA	NA	NA	NA	NA
A w1118	<2e-16	0.0007	<2e-16	0.007	<2e-16	NA	NA	NA	NA	NA	NA
C dptS69	<2e-16	0.1208	0.1473	<2e-16	0.0001	<2e-16	NA	NA	NA	NA	NA
C Δdpt	<2e-16	0.0005	0.0002	<2e-16	<2e-16	<2e-16	0.3672	NA	NA	NA	NA
C dptS69R	<2e-16	0.0193	0.0086	<2e-16	<2e-16	<2e-16	0.9995	0.8062	NA	NA	NA
C imd-	0.0057	0.7281	0.963	<2e-16	0.0242	<2e-16	0.934	0.013	0.3953	NA	NA
C OreR	0.0024	0.5452	0.8351	<2e-16	0.0105	<2e-16	0.9979	0.0653	0.8078	1	NA
C w1118	0.9996	1	0.8729	0.3974	1	<2e-16	0.0003	<2e-16	<2e-16	0.0781	0.0352
