# Supplementary material for: A suite of selective pressures supports the maintenance of alleles of a Drosophila immune peptide
Source: eLife. 2025 May 30;12:RP90638. doi: 10.7554/eLife.90638 (PMC12124834; doi:10.7554/eLife.90638)
Supplement: Supplementary file 8. — p-Values less than 0.05 are underlined. ‘A’ refers to flies reared axenically, ‘C’ refers to flies reared on a conventional diet. [file elife-90638-supp8.xlsx]

## Sheet: Sheet1
	A dptS69	A	A	A	A	A	C	C	C	C	C
		Δdpt	dptS69R	imd-	OreR	w1118	dptS69	Δdpt	dptS69R	imd-	OreR
A Δdpt	0.0295	NA	NA	NA	NA	NA	NA	NA	NA	NA	NA
A dptS69R	<2e-16	0.0022	NA	NA	NA	NA	NA	NA	NA	NA	NA
A imd-	<2e-16	<2e-16	0.9288	NA	NA	NA	NA	NA	NA	NA	NA
A OreR	0.0043	1	0.0008	<2e-16	NA	NA	NA	NA	NA	NA	NA
A W1118	<2e-16	<2e-16	<2e-16	0.0038	<2e-16	NA	NA	NA	NA	NA	NA
C dptS69	0.0005	<2e-16	<2e-16	<2e-16	<2e-16	<2e-16	NA	NA	NA	NA	NA
C Δdpt	0.0055	<2e-16	<2e-16	<2e-16	<2e-16	<2e-16	1	NA	NA	NA	NA
C dptS69R	<2e-16	0.0614	0.998	0.3139	0.0407	<2e-16	<2e-16	<2e-16	NA	NA	NA
C imd-	0.0002	0.9988	0.0306	<2e-16	0.9995	<2e-16	<2e-16	<2e-16	0.3851	NA	NA
C OreR	0.7443	0.9473	<2e-16	<2e-16	0.828	<2e-16	<2e-16	<2e-16	0.0001	0.325	NA
C w1118	<2e-16	<2e-16	0.0001	0.0374	0	1	<2e-16	<2e-16	<2e-16	<2e-16	<2e-16
