# Supplementary material for: A suite of selective pressures supports the maintenance of alleles of a Drosophila immune peptide
Source: eLife. 2025 May 30;12:RP90638. doi: 10.7554/eLife.90638 (PMC12124834; doi:10.7554/eLife.90638)
Supplement: Supplementary file 9. — p-Values less than 0.05 are underlined. ‘F’ and ‘M’ refer to males and females, respectively; ‘het’ refers to heterozygotes for serine/arginine. [file elife-90638-supp9.xlsx]

## Sheet: Sheet1
	F	F	F	F	F	M	M	M	M
	het	imd-	Δdpt	dptS69R	dptS69	het	imd-	Δdpt	dptS69R
F imd-	1	NA	NA	NA	NA	NA	NA	NA	NA
F Δdpt	1	1	NA	NA	NA	NA	NA	NA	NA
F dptS69R	<2e-16	<2e-16	<2e-16	NA	NA	NA	NA	NA	NA
F dptS69	<2e-16	0.0003	<2e-16	0.6785	NA	NA	NA	NA	NA
M het	<2e-16	<2e-16	<2e-16	0.9797	0.0443	NA	NA	NA	NA
M imd-	0.1346	0.3182	0.0498	0.0025	0.5097	0	NA	NA	NA
M Δdpt	<2e-16	<2e-16	<2e-16	0.948	0.9977	0.1163	0.0321	NA	NA
M dptS69R	<2e-16	<2e-16	<2e-16	0.0622	<2e-16	0.4311	<2e-16	<2e-16	NA
M dptS69	<2e-16	<2e-16	<2e-16	0.9984	0.9882	0.5841	0.0492	1	0.0043
