# Supplementary material for: A suite of selective pressures supports the maintenance of alleles of a Drosophila immune peptide
Source: eLife. 2025 May 30;12:RP90638. doi: 10.7554/eLife.90638 (PMC12124834; doi:10.7554/eLife.90638)
Supplement: Supplementary file 10. — Counts of serine/arginine polymorphism genotypes for wild-caught D. melanogaster including Wolbachia infection status and sex. [file elife-90638-supp10.xlsx]

## Sheet: Sheet1
Wolbachia/Sex	SS	SR	RR
Wolbachia+ female	203	64	8
Wolbachia+ male	369	77	9
Wolbachia- female	68	21	2
Wolbachia- male	102	31	1
Total	742	193	20
